# Supplementary material for: Post-translational processing targets functionally diverse proteins in Mycoplasma hyopneumoniae
Source: PubMed Central journal article supplement (PMC4772806; doi:10.1098/rsob.150210), 2016-02-10
Supplement: rsob150210supp4.pdf [file rsob150210supp4.pdf]

## Supplementary Figure S4:

### Spectra and fragmentation tables identifying single-peptide protein identifications

| ID # | Accession | m/z    | z | Error (ppm) | Peptide          | Score |
|------|-----------|--------|---|-------------|------------------|-------|
| 285  | Q4A9X7    | 985.07 | 2 | 74          | QLVELYDFEISELENK | 60    |
| 335  | Q4AA71    | 781.48 | 2 | 63          | IWLISEGIENLFK    | 45.7  |
| 339  | Q4AAC5    | 747.87 | 2 | 4.9         | VDDENLDSIFSK     | 70.2  |
| 344  | Q4AA34    | 630.37 | 2 | 2.1         | VVGISLTLNLR      | 51.8  |
| 345  | A4Q7T6    | 985.07 | 2 | 74          | QLVELYDFEISELENK | 68.6  |
| 347  | Q4A9M3    | 822.94 | 2 | 10          | YNLSNFFILISDAK   | 51.4  |

#285 Q4A9X7 MHJ\_0356 Putative P37-like ABC transporter substrate-binding lipoprotein – identified from TX-114 1DGE LC-MS/MS (Slice 14)

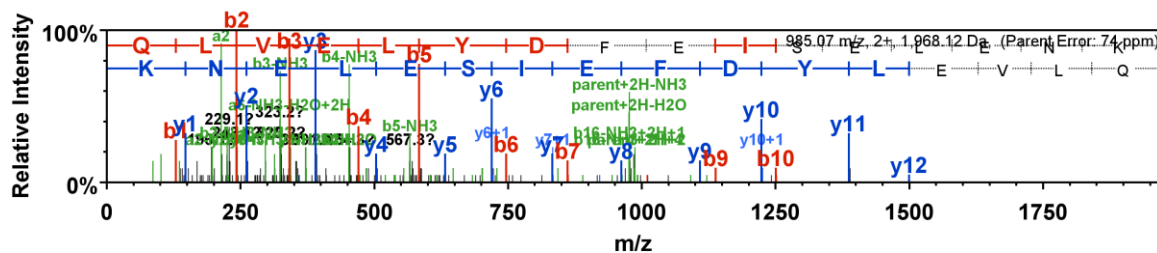

| B  | B Ions  | B+2H  | B-NH3   | B-H2O   | AA | Y Ions  | Y+2H  | Y-NH3   | Y-H2O   | Y  |
|----|---------|-------|---------|---------|----|---------|-------|---------|---------|----|
| 1  | 129.1   |       | 112.0   |         | Q  | 1,969.0 | 985.0 | 1,952.0 | 1,951.0 | 16 |
| 2  | 242.1   |       | 225.1   |         | L  | 1,840.9 | 921.0 | 1,823.9 | 1,822.9 | 15 |
| 3  | 341.2   |       | 324.2   |         | V  | 1,727.8 | 864.4 | 1,710.8 | 1,709.8 | 14 |
| 4  | 470.3   |       | 453.2   | 452.3   | E  | 1,628.8 | 814.9 | 1,611.7 | 1,610.8 | 13 |
| 5  | 583.3   |       | 566.3   | 565.3   | L  | 1,499.7 | 750.4 | 1,482.7 | 1,481.7 | 12 |
| 6  | 746.4   | 373.7 | 729.4   | 728.4   | Y  | 1,386.6 | 693.8 | 1,369.6 | 1,368.6 | 11 |
| 7  | 861.4   | 431.2 | 844.4   | 843.4   | D  | 1,223.6 | 612.3 | 1,206.6 | 1,205.6 | 10 |
| 8  | 1,008.5 | 504.8 | 991.5   | 990.5   | F  | 1,108.6 | 554.8 | 1,091.5 | 1,090.5 | 9  |
| 9  | 1,137.5 | 569.3 | 1,120.5 | 1,119.5 | E  | 961.5   | 481.2 | 944.5   | 943.5   | 8  |
| 10 | 1,250.6 | 625.8 | 1,233.6 | 1,232.6 | I  | 832.4   | 416.7 | 815.4   | 814.4   | 7  |
| 11 | 1,337.7 | 669.3 | 1,320.6 | 1,319.7 | S  | 719.4   | 360.2 | 702.3   | 701.3   | 6  |
| 12 | 1,466.7 | 733.9 | 1,449.7 | 1,448.7 | E  | 632.3   |       | 615.3   | 614.3   | 5  |
| 13 | 1,579.8 | 790.4 | 1,562.8 | 1,561.8 | L  | 503.3   |       | 486.3   | 485.3   | 4  |
| 14 | 1,708.8 | 854.9 | 1,691.8 | 1,690.8 | E  | 390.2   |       | 373.2   | 372.2   | 3  |
| 15 | 1,822.9 | 911.9 | 1,805.8 | 1,804.9 | N  | 261.2   |       | 244.1   |         | 2  |
| 16 | 1,969.0 | 985.0 | 1,952.0 | 1,951.0 | K  | 147.1   |       | 130.1   |         | 1  |

#335 Q4AA71 MHJ\_0259 UPF0348 protein – identified from TX-114 1DGE LC-MS/MS (Slice 10)

Correct mass context for predicted intact protein

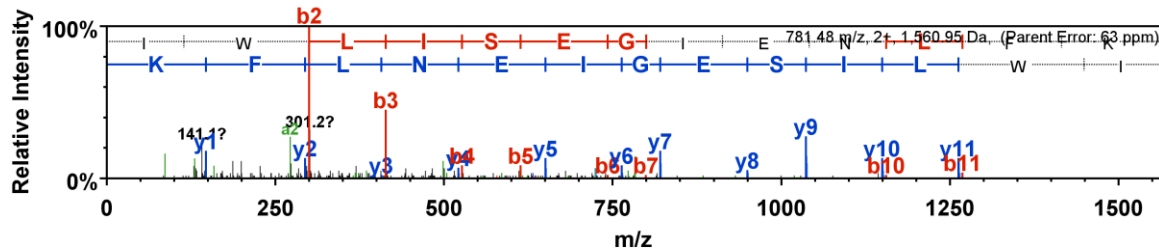

| B  | B Ions  | B+2H  | B-NH3   | B-H2O   | AA | Y Ions  | Y+2H  | Y-NH3   | Y-H2O   | Y  |
|----|---------|-------|---------|---------|----|---------|-------|---------|---------|----|
| 1  | 114.1   |       |         |         | I  | 1,561.9 | 781.4 | 1,544.8 | 1,543.9 | 13 |
| 2  | 300.2   |       |         |         | W  | 1,448.8 | 724.9 | 1,431.8 | 1,430.8 | 12 |
| 3  | 413.3   |       |         |         | L  | 1,262.7 | 631.9 | 1,245.7 | 1,244.7 | 11 |
| 4  | 526.3   |       |         |         | I  | 1,149.6 | 575.3 | 1,132.6 | 1,131.6 | 10 |
| 5  | 613.4   |       |         | 595.4   | S  | 1,036.5 | 518.8 | 1,019.5 | 1,018.5 | 9  |
| 6  | 742.4   | 371.7 |         | 724.4   | E  | 949.5   | 475.3 | 932.5   | 931.5   | 8  |
| 7  | 799.4   | 400.2 |         | 781.4   | G  | 820.5   | 410.7 | 803.4   | 802.4   | 7  |
| 8  | 912.5   | 456.8 |         | 894.5   | I  | 763.4   | 382.2 | 746.4   | 745.4   | 6  |
| 9  | 1,041.6 | 521.3 |         | 1,023.6 | E  | 650.4   |       | 633.3   | 632.3   | 5  |
| 10 | 1,155.6 | 578.3 | 1,138.6 | 1,137.6 | N  | 521.3   |       | 504.3   |         | 4  |
| 11 | 1,268.7 | 634.8 | 1,251.7 | 1,250.7 | L  | 407.3   |       | 390.2   |         | 3  |
| 12 | 1,415.8 | 708.4 | 1,398.7 | 1,397.7 | F  | 294.2   |       | 277.2   |         | 2  |
| 13 | 1,561.9 | 781.4 | 1,544.8 | 1,543.9 | K  | 147.1   |       | 130.1   |         | 1  |

#339 Q4AAC5 MHJ\_0205 tRNA modification GTPase MnmE (EC 3.6.-.-) – identified from QTOF 1DGE LC-MS/MS (Slice 7)

Correct mass context for predicted intact protein

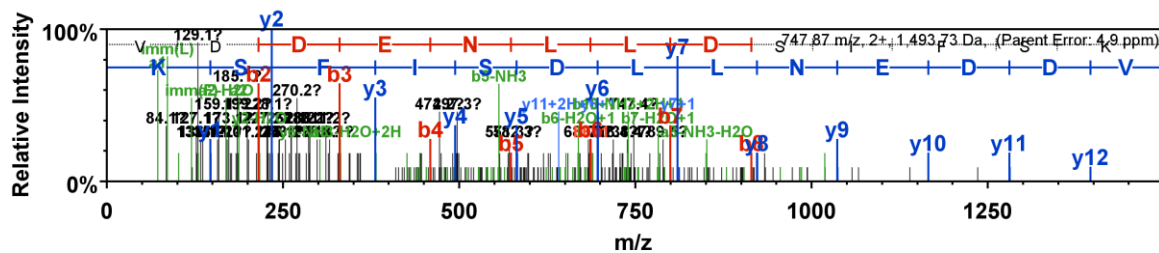

| B  | B Ions  | B+2H  | B-NH3   | B-H2O   | AA | Y Ions  | Y+2H  | Y-NH3   | Y-H2O   | Y  |
|----|---------|-------|---------|---------|----|---------|-------|---------|---------|----|
| 1  | 100.1   |       |         |         | V  | 1,494.7 | 747.9 | 1,477.7 | 1,476.7 | 13 |
| 2  | 215.1   |       |         | 197.1   | D  | 1,395.7 | 698.3 | 1,378.6 | 1,377.7 | 12 |
| 3  | 330.1   |       |         | 312.1   | D  | 1,280.6 | 640.8 | 1,263.6 | 1,262.6 | 11 |
| 4  | 459.2   |       |         | 441.2   | E  | 1,165.6 | 583.3 | 1,148.6 | 1,147.6 | 10 |
| 5  | 573.2   |       | 556.2   | 555.2   | N  | 1,036.6 | 518.8 | 1,019.5 | 1,018.6 | 9  |
| 6  | 686.3   | 343.7 | 669.3   | 668.3   | L  | 922.5   | 461.8 | 905.5   | 904.5   | 8  |
| 7  | 799.4   | 400.2 | 782.4   | 781.4   | L  | 809.4   | 405.2 | 792.4   | 791.4   | 7  |
| 8  | 914.4   | 457.7 | 897.4   | 896.4   | D  | 696.4   | 348.7 | 679.3   | 678.3   | 6  |
| 9  | 1,001.4 | 501.2 | 984.4   | 983.4   | S  | 581.3   |       | 564.3   | 563.3   | 5  |
| 10 | 1,114.5 | 557.8 | 1,097.5 | 1,096.5 | I  | 494.3   |       | 477.3   | 476.3   | 4  |
| 11 | 1,261.6 | 631.3 | 1,244.6 | 1,243.6 | F  | 381.2   |       | 364.2   | 363.2   | 3  |
| 12 | 1,348.6 | 674.8 | 1,331.6 | 1,330.6 | S  | 234.1   |       | 217.1   | 216.1   | 2  |
| 13 | 1,494.7 | 747.9 | 1,477.7 | 1,476.7 | K  | 147.1   |       | 130.1   |         | 1  |

#344 Q4AA34 MHJ\_0297 Putative ABC transporter ATP-binding protein – identified from QTOF overload lane (Slice 1)

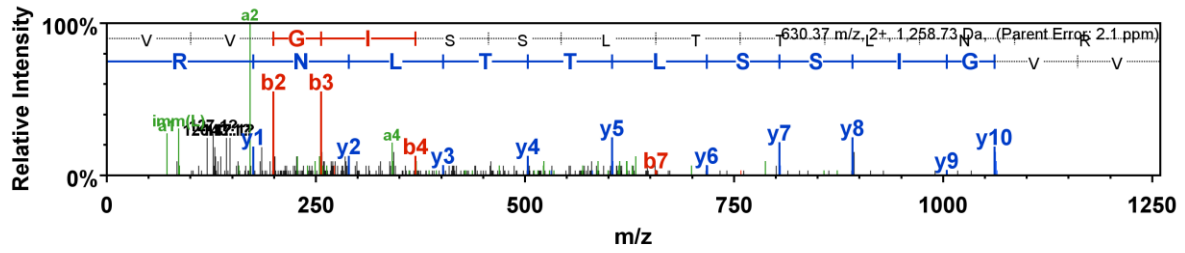

| B  | B Ions  | B+2H  | B-NH3   | B-H2O   | AA | Y Ions  | Y+2H  | Y-NH3   | Y-H2O   | Y  |
|----|---------|-------|---------|---------|----|---------|-------|---------|---------|----|
| 1  | 100.1   |       |         |         | V  | 1,259.7 | 630.4 | 1,242.7 | 1,241.7 | 12 |
| 2  | 199.1   |       |         |         | V  | 1,160.7 | 580.8 | 1,143.6 | 1,142.7 | 11 |
| 3  | 256.2   |       |         |         | G  | 1,061.6 | 531.3 | 1,044.6 | 1,043.6 | 10 |
| 4  | 369.2   |       |         |         | I  | 1,004.6 | 502.8 | 987.5   | 986.6   | 9  |
| 5  | 456.3   |       |         | 438.3   | S  | 891.5   | 446.2 | 874.5   | 873.5   | 8  |
| 6  | 543.3   | 272.2 |         | 525.3   | S  | 804.5   | 402.7 | 787.4   | 786.4   | 7  |
| 7  | 656.4   | 328.7 |         | 638.4   | L  | 717.4   | 359.2 | 700.4   | 699.4   | 6  |
| 8  | 757.4   | 379.2 |         | 739.4   | T  | 604.3   |       | 587.3   | 586.3   | 5  |
| 9  | 858.5   | 429.8 |         | 840.5   | T  | 503.3   |       | 486.3   | 485.3   | 4  |
| 10 | 971.6   | 486.3 |         | 953.6   | L  | 402.2   |       | 385.2   |         | 3  |
| 11 | 1,085.6 | 543.3 | 1,068.6 | 1,067.6 | N  | 289.2   |       | 272.1   |         | 2  |
| 12 | 1,259.7 | 630.4 | 1,242.7 | 1,241.7 | R  | 175.1   |       | 158.1   |         | 1  |

#345 A4Q7T6 MHJ\_0696 Uncharacterised protein – identified from TX-114 1DGE LC-MS/MS (Slice 14). Correct mass context for predicted intact protein

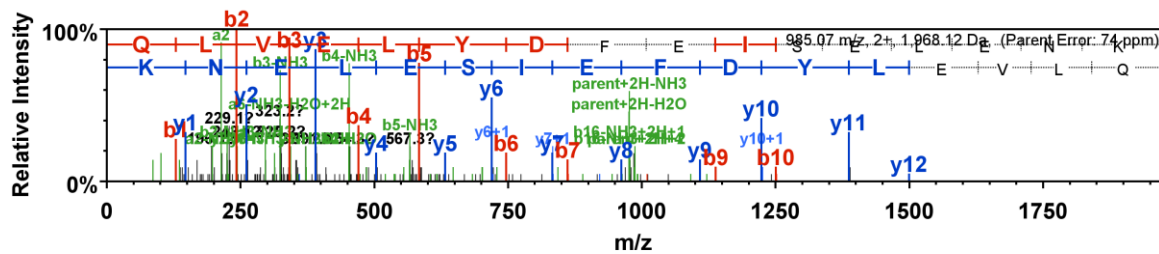

| B  | B Ions  | B+2H  | B-NH3   | B-H2O   | AA | Y Ions  | Y+2H  | Y-NH3   | Y-H2O   | Y  |
|----|---------|-------|---------|---------|----|---------|-------|---------|---------|----|
| 1  | 129.1   |       | 112.0   |         | Q  | 1,969.0 | 985.0 | 1,952.0 | 1,951.0 | 16 |
| 2  | 242.1   |       | 225.1   |         | L  | 1,840.9 | 921.0 | 1,823.9 | 1,822.9 | 15 |
| 3  | 341.2   |       | 324.2   |         | V  | 1,727.8 | 864.4 | 1,710.8 | 1,709.8 | 14 |
| 4  | 470.3   |       | 453.2   | 452.3   | E  | 1,628.8 | 814.9 | 1,611.7 | 1,610.8 | 13 |
| 5  | 583.3   |       | 566.3   | 565.3   | L  | 1,499.7 | 750.4 | 1,482.7 | 1,481.7 | 12 |
| 6  | 746.4   | 373.7 | 729.4   | 728.4   | Y  | 1,386.6 | 693.8 | 1,369.6 | 1,368.6 | 11 |
| 7  | 861.4   | 431.2 | 844.4   | 843.4   | D  | 1,223.6 | 612.3 | 1,206.6 | 1,205.6 | 10 |
| 8  | 1,008.5 | 504.8 | 991.5   | 990.5   | F  | 1,108.6 | 554.8 | 1,091.5 | 1,090.5 | 9  |
| 9  | 1,137.5 | 569.3 | 1,120.5 | 1,119.5 | E  | 961.5   | 481.2 | 944.5   | 943.5   | 8  |
| 10 | 1,250.6 | 625.8 | 1,233.6 | 1,232.6 | I  | 832.4   | 416.7 | 815.4   | 814.4   | 7  |
| 11 | 1,337.7 | 669.3 | 1,320.6 | 1,319.7 | S  | 719.4   | 360.2 | 702.3   | 701.3   | 6  |
| 12 | 1,466.7 | 733.9 | 1,449.7 | 1,448.7 | E  | 632.3   |       | 615.3   | 614.3   | 5  |
| 13 | 1,579.8 | 790.4 | 1,562.8 | 1,561.8 | L  | 503.3   |       | 486.3   | 485.3   | 4  |
| 14 | 1,708.8 | 854.9 | 1,691.8 | 1,690.8 | E  | 390.2   |       | 373.2   | 372.2   | 3  |
| 15 | 1,822.9 | 911.9 | 1,805.8 | 1,804.9 | N  | 261.2   |       | 244.1   |         | 2  |
| 16 | 1,969.0 | 985.0 | 1,952.0 | 1,951.0 | K  | 147.1   |       | 130.1   |         | 1  |

#347 Q4A9M3 MHJ\_0462 tRNA (guanine-N(7)-)-methyltransferase (EC 2.1.1.33) (tRNA (guanine(46)-N(7))-methyltransferase) – identified from QTOF overload lane (Slice 25)

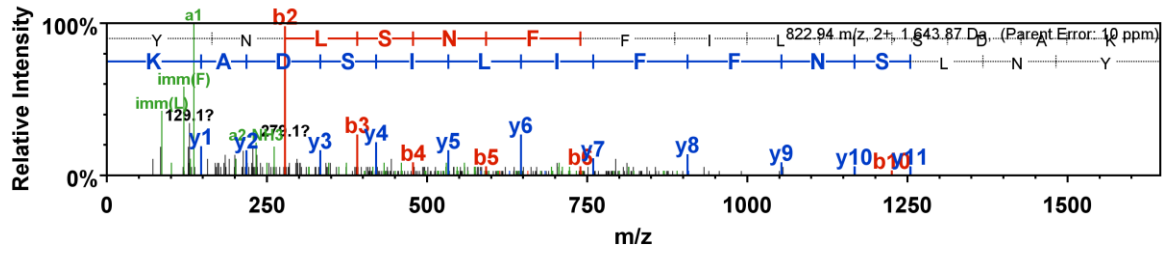

| B  | B Ions  | B+2H  | B-NH3   | B-H2O   | AA | Y Ions  | Y+2H  | Y-NH3   | Y-H2O   | Y  |
|----|---------|-------|---------|---------|----|---------|-------|---------|---------|----|
| 1  | 164.1   |       |         |         | Y  | 1,644.9 | 822.9 | 1,627.8 | 1,626.9 | 14 |
| 2  | 278.1   |       | 261.1   |         | N  | 1,481.8 | 741.4 | 1,464.8 | 1,463.8 | 13 |
| 3  | 391.2   |       | 374.2   |         | L  | 1,367.8 | 684.4 | 1,350.7 | 1,349.7 | 12 |
| 4  | 478.2   |       | 461.2   | 460.2   | S  | 1,254.7 | 627.8 | 1,237.6 | 1,236.7 | 11 |
| 5  | 592.3   |       | 575.2   | 574.3   | N  | 1,167.6 | 584.3 | 1,150.6 | 1,149.6 | 10 |
| 6  | 739.3   | 370.2 | 722.3   | 721.3   | F  | 1,053.6 | 527.3 | 1,036.6 | 1,035.6 | 9  |
| 7  | 886.4   | 443.7 | 869.4   | 868.4   | F  | 906.5   | 453.8 | 889.5   | 888.5   | 8  |
| 8  | 999.5   | 500.3 | 982.5   | 981.5   | I  | 759.5   | 380.2 | 742.4   | 741.5   | 7  |
| 9  | 1,112.6 | 556.8 | 1,095.6 | 1,094.6 | L  | 646.4   | 323.7 | 629.4   | 628.4   | 6  |
| 10 | 1,225.7 | 613.3 | 1,208.6 | 1,207.7 | I  | 533.3   |       | 516.3   | 515.3   | 5  |
| 11 | 1,312.7 | 656.9 | 1,295.7 | 1,294.7 | S  | 420.2   |       | 403.2   | 402.2   | 4  |
| 12 | 1,427.7 | 714.4 | 1,410.7 | 1,409.7 | D  | 333.2   |       | 316.2   | 315.2   | 3  |
| 13 | 1,498.8 | 749.9 | 1,481.7 | 1,480.7 | A  | 218.1   |       | 201.1   |         | 2  |
| 14 | 1,644.9 | 822.9 | 1,627.8 | 1,626.9 | K  | 147.1   |       | 130.1   |         | 1  |

**Spectra and fragmentation tables identifying semi-tryptic peptide identifications mapping to P65 (MHJ\_0656, Q4A932)**

| Site | Peptide sequence                                                                | Score | E value | Identified       | No. |
|------|---------------------------------------------------------------------------------|-------|---------|------------------|-----|
| 1-1  | K. <u>90</u> NSLVSYDNLAI <u>SGTTTE</u> <sup>106</sup> .N                        | 61    | 0.0011  | Peptide-centric* | 5   |
| 1-2  | E. <sup>107</sup> NWLYLLNPTK <sup>116</sup> . <u>Y</u>                          | 50    | 0.011   | Peptide-centric  | 1   |
| 1-3  | E. <sup>107</sup> NWLYLLNPTKYP <u>NGK</u> <sup>121</sup> .M +<br>Deamidated (N) | 51    | 0.011   | Peptide-centric  | 1   |
| 2-1  | M. <sup>168</sup> SVGANDPFLAIFNEFK <sup>184</sup> .K                            | 74    | 4.4e-06 | WCL Ion Trap     | 2   |
| 2-2  | M. <sup>168</sup> SVGANDPFLAIFNEFK <sup>184</sup> .K                            | 50    | 0.0025  | TX114 Q-TOF      | 1   |
| 2-3  | M. <sup>168</sup> SVGANDPFLAIFNEFK <sup>184</sup> .K                            | 82    | 0.011   | Gel Spots        | 1   |
| 4-1  | F. <sup>504</sup> FAELNTDQEIK <sup>514</sup> .E                                 | 56    | 0.0024  | WCL Q-TOF        | 1   |
| 4-2  | F. <sup>504</sup> FAELNTDQEIK <sup>514</sup> .E                                 | 90    | 0.0014  | Gel Spots        | 6   |
| 4-3  | F. <sup>504</sup> FAELNTDQEIK <sup>514</sup> .E +<br>Deamidated (Q)             | 108   | 2.8e-05 | Gel Spots        | 2   |

Table shows site of cleavage that semi-tryptic peptide denotes in P65 according to figure 2, with peptide sequence showing amino acid positions and semi-tryptic terminus (underlined). No. indicates the number of times a peptide was identified by a given method. In the case where peptides were identified multiple times or in multiple runs, only the highest-scoring peptide is shown. \*Peptide centric methods described below.

#1-1. Peptide-centric analysis

MS/MS Fragmentation of (K)<sup>90</sup>NSLVSYDNLAISGTTTE<sup>106</sup>(N)

Mascot Ion Score: 61

E-value: 0.0011

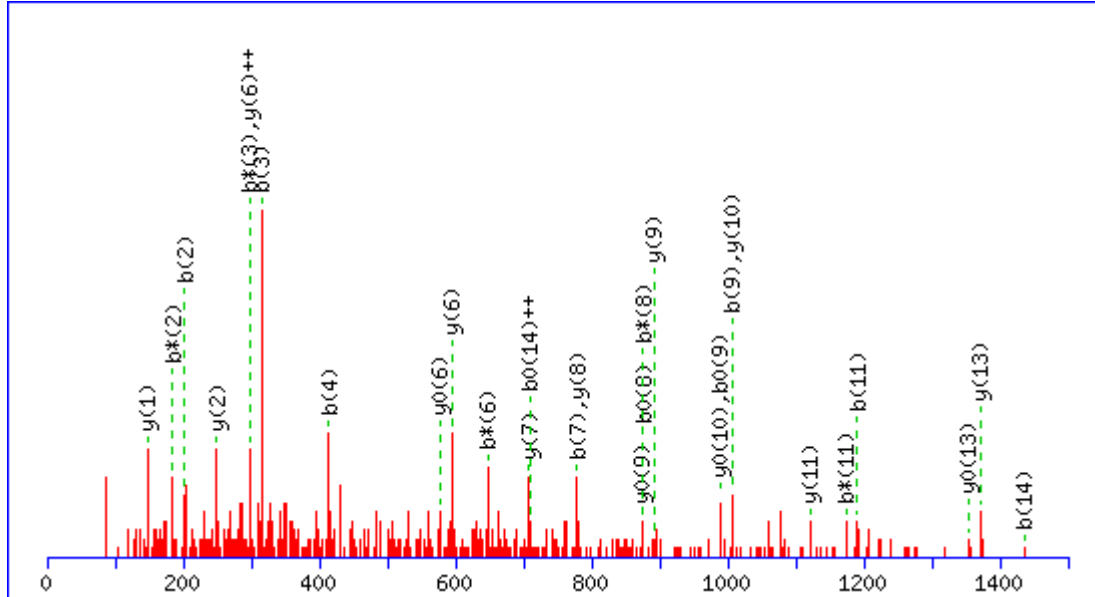

| # | b               | b <sup>++</sup> | b <sup>*</sup>  | b <sup>+++</sup> | b <sup>0</sup> | b <sup>0++</sup> | Seq. | y                | y <sup>++</sup> | y <sup>*</sup> | y <sup>+++</sup> | y <sup>0</sup>   | y <sup>0++</sup> | #  |
|---|-----------------|-----------------|-----------------|------------------|----------------|------------------|------|------------------|-----------------|----------------|------------------|------------------|------------------|----|
| 1 | 115.0502        | 58.0287         | 98.0237         | 49.5155          |                |                  | N    |                  |                 |                |                  |                  |                  | 17 |
| 2 | <b>202.0822</b> | 101.5448        | <b>185.0557</b> | 93.0315          | 184.0717       | 92.5395          | S    | 1670.8119        | 835.9096        | 1653.7854      | 827.3963         | 1652.8014        | 826.9043         | 16 |
| 3 | <b>315.1663</b> | 158.0868        | <b>298.1397</b> | 149.5735         | 297.1557       | 149.0815         | L    | 1583.7799        | 792.3936        | 1566.7534      | 783.8803         | 1565.7693        | 783.3883         | 15 |
| 4 | <b>414.2347</b> | 207.6210        | 397.2082        | 199.1077         | 396.2241       | 198.6157         | V    | 1470.6958        | 735.8516        | 1453.6693      | 727.3383         | 1452.6853        | 726.8463         | 14 |
| 5 | 501.2667        | 251.1370        | 484.2402        | 242.6237         | 483.2562       | 242.1317         | S    | <b>1371.6274</b> | 686.3174        | 1354.6009      | 677.8041         | <b>1353.6169</b> | 677.3121         | 13 |
| 6 | 664.3301        | 332.6687        | <b>647.3035</b> | 324.1554         | 646.3195       | 323.6634         | Y    | 1284.5954        | 642.8013        | 1267.5689      | 634.2881         | 1266.5848        | 633.7961         | 12 |
| 7 | <b>779.3570</b> | 390.1821        | 762.3305        | 381.6689         | 761.3464       | 381.1769         | D    | <b>1121.5321</b> | 561.2697        | 1104.5055      | 552.7564         | 1103.5215        | 552.2644         | 11 |

|    |           |          |           |          |           |          |   |           |          |          |          |          |          |    |
|----|-----------|----------|-----------|----------|-----------|----------|---|-----------|----------|----------|----------|----------|----------|----|
| 8  | 893.3999  | 447.2036 | 876.3734  | 438.6903 | 875.3894  | 438.1983 | N | 1006.5051 | 503.7562 | 989.4786 | 495.2429 | 988.4946 | 494.7509 | 10 |
| 9  | 1006.4840 | 503.7456 | 989.4575  | 495.2324 | 988.4734  | 494.7404 | L | 892.4622  | 446.7347 |          |          | 874.4516 | 437.7295 | 9  |
| 10 | 1077.5211 | 539.2642 | 1060.4946 | 530.7509 | 1059.5105 | 530.2589 | A | 779.3781  | 390.1927 |          |          | 761.3676 | 381.1874 | 8  |
| 11 | 1190.6052 | 595.8062 | 1173.5786 | 587.2930 | 1172.5946 | 586.8009 | I | 708.3410  | 354.6742 |          |          | 690.3305 | 345.6689 | 7  |
| 12 | 1277.6372 | 639.3222 | 1260.6107 | 630.8090 | 1259.6266 | 630.3170 | S | 595.2570  | 298.1321 |          |          | 577.2464 | 289.1268 | 6  |
| 13 | 1334.6587 | 667.8330 | 1317.6321 | 659.3197 | 1316.6481 | 658.8277 | G | 508.2249  | 254.6161 |          |          | 490.2144 | 245.6108 | 5  |
| 14 | 1435.7063 | 718.3568 | 1418.6798 | 709.8435 | 1417.6958 | 709.3515 | T | 451.2035  | 226.1054 |          |          | 433.1929 | 217.1001 | 4  |
| 15 | 1536.7540 | 768.8807 | 1519.7275 | 760.3674 | 1518.7435 | 759.8754 | T | 350.1558  | 175.5815 |          |          | 332.1452 | 166.5763 | 3  |
| 16 | 1637.8017 | 819.4045 | 1620.7752 | 810.8912 | 1619.7911 | 810.3992 | T | 249.1081  | 125.0577 |          |          | 231.0975 | 116.0524 | 2  |
| 17 |           |          |           |          |           |          | E | 148.0604  | 74.5339  |          |          | 130.0499 | 65.5286  | 1  |

### #1-2. Peptide-centric analysis

MS/MS Fragmentation of E.<sup>107</sup>NWLYLLNPTK<sup>116</sup>.Y

Mascot Ion Score: 50

E-value: 0.011

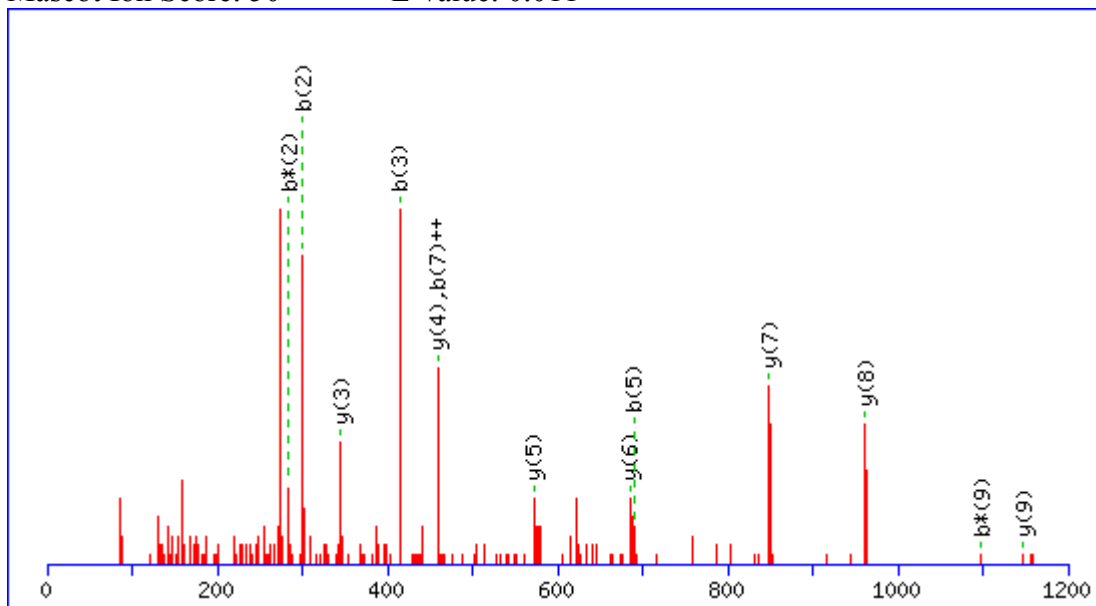

| #  | b         | b <sup>++</sup> | b <sup>*</sup> | b <sup>*++</sup> | b <sup>0</sup> | b <sup>0++</sup> | Seq. | y         | y <sup>++</sup> | y <sup>*</sup> | y <sup>*++</sup> | y <sup>0</sup> | y <sup>0++</sup> | #  |
|----|-----------|-----------------|----------------|------------------|----------------|------------------|------|-----------|-----------------|----------------|------------------|----------------|------------------|----|
| 1  | 115.0502  | 58.0287         | 98.0237        | 49.5155          |                |                  | N    |           |                 |                |                  |                |                  | 10 |
| 2  | 301.1295  | 151.0684        | 284.1030       | 142.5551         |                |                  | W    | 1147.6510 | 574.3291        | 1130.6245      | 565.8159         | 1129.6404      | 565.3239         | 9  |
| 3  | 414.2136  | 207.6104        | 397.1870       | 199.0972         |                |                  | L    | 961.5717  | 481.2895        | 944.5451       | 472.7762         | 943.5611       | 472.2842         | 8  |
| 4  | 577.2769  | 289.1421        | 560.2504       | 280.6288         |                |                  | Y    | 848.4876  | 424.7475        | 831.4611       | 416.2342         | 830.4771       | 415.7422         | 7  |
| 5  | 690.3610  | 345.6841        | 673.3344       | 337.1709         |                |                  | L    | 685.4243  | 343.2158        | 668.3978       | 334.7025         | 667.4137       | 334.2105         | 6  |
| 6  | 803.4450  | 402.2262        | 786.4185       | 393.7129         |                |                  | L    | 572.3402  | 286.6738        | 555.3137       | 278.1605         | 554.3297       | 277.6685         | 5  |
| 7  | 917.4880  | 459.2476        | 900.4614       | 450.7343         |                |                  | N    | 459.2562  | 230.1317        | 442.2296       | 221.6185         | 441.2456       | 221.1264         | 4  |
| 8  | 1014.5407 | 507.7740        | 997.5142       | 499.2607         |                |                  | P    | 345.2132  | 173.1103        | 328.1867       | 164.5970         | 327.2027       | 164.1050         | 3  |
| 9  | 1115.5884 | 558.2978        | 1098.5619      | 549.7846         | 1097.5778      | 549.2926         | T    | 248.1605  | 124.5839        | 231.1339       | 116.0706         | 230.1499       | 115.5786         | 2  |
| 10 |           |                 |                |                  |                |                  | K    | 147.1128  | 74.0600         | 130.0863       | 65.5468          |                |                  | 1  |

### #1-3. Peptide-centric analysis

MS/MS Fragmentation of E.<sup>107</sup>NWLYLLNPTKYPNGK<sup>121</sup>.M + Deamidated (N)

Mascot Ion Score: 51

E-value: 0.011

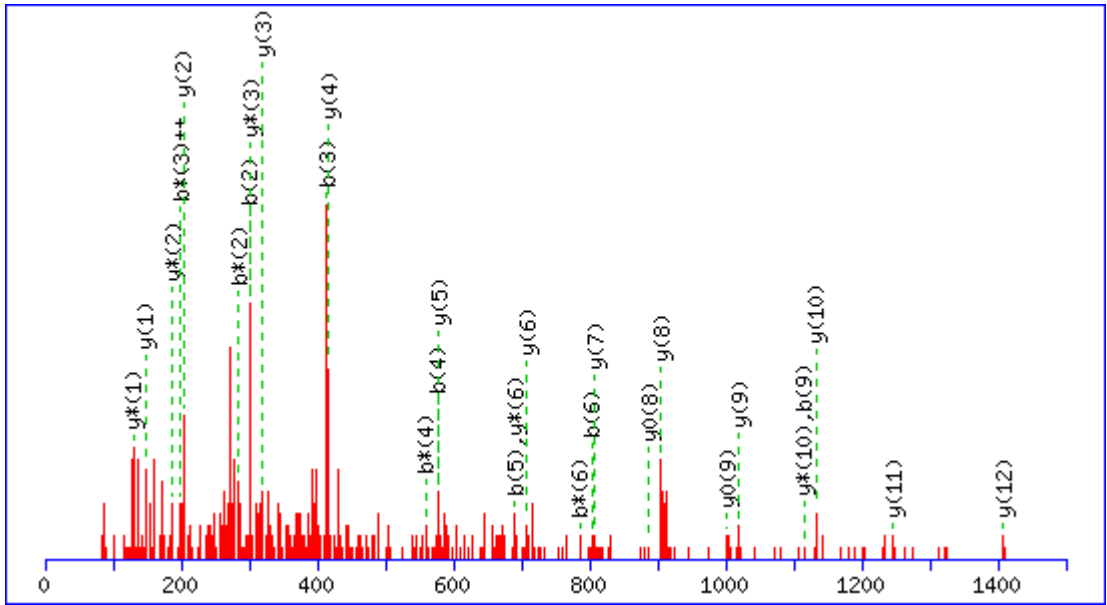

| #  | b                | b <sup>++</sup> | b*              | b <sup>++</sup> | b <sup>0</sup> | b <sup>0++</sup> | Seq. | y                | y <sup>++</sup> | y*               | y <sup>++</sup> | y <sup>0</sup>   | y <sup>0++</sup> | #  |
|----|------------------|-----------------|-----------------|-----------------|----------------|------------------|------|------------------|-----------------|------------------|-----------------|------------------|------------------|----|
| 1  | 115.0502         | 58.0287         | 98.0237         | 49.5155         |                |                  | N    |                  |                 |                  |                 |                  |                  | 15 |
| 2  | <b>301.1295</b>  | 151.0684        | <b>284.1030</b> | 142.5551        |                |                  | W    | 1707.9105        | 854.4589        | 1690.8839        | 845.9456        | 1689.8999        | 845.4536         | 14 |
| 3  | <b>414.2136</b>  | 207.6104        | 397.1870        | <b>199.0972</b> |                |                  | L    | 1521.8312        | 761.4192        | 1504.8046        | 752.9059        | 1503.8206        | 752.4139         | 13 |
| 4  | <b>577.2769</b>  | 289.1421        | <b>560.2504</b> | 280.6288        |                |                  | Y    | <b>1408.7471</b> | 704.8772        | 1391.7205        | 696.3639        | 1390.7365        | 695.8719         | 12 |
| 5  | <b>690.3610</b>  | 345.6841        | 673.3344        | 337.1709        |                |                  | L    | <b>1245.6838</b> | 623.3455        | 1228.6572        | 614.8322        | 1227.6732        | 614.3402         | 11 |
| 6  | <b>803.4450</b>  | 402.2262        | <b>786.4185</b> | 393.7129        |                |                  | L    | <b>1132.5997</b> | 566.8035        | <b>1115.5732</b> | 558.2902        | 1114.5891        | 557.7982         | 10 |
| 7  | 917.4880         | 459.2476        | 900.4614        | 450.7343        |                |                  | N    | <b>1019.5156</b> | 510.2615        | 1002.4891        | 501.7482        | <b>1001.5051</b> | 501.2562         | 9  |
| 8  | 1014.5407        | 507.7740        | 997.5142        | 499.2607        |                |                  | P    | <b>905.4727</b>  | 453.2400        | 888.4462         | 444.7267        | <b>887.4621</b>  | 444.2347         | 8  |
| 9  | <b>1115.5884</b> | 558.2978        | 1098.5619       | 549.7846        | 1097.5778      | 549.2926         | T    | <b>808.4199</b>  | 404.7136        | 791.3934         | 396.2003        | 790.4094         | 395.7083         | 7  |
| 10 | 1243.6834        | 622.3453        | 1226.6568       | 613.8320        | 1225.6728      | 613.3400         | K    | <b>707.3723</b>  | 354.1898        | <b>690.3457</b>  | 345.6765        |                  |                  | 6  |
| 11 | 1406.7467        | 703.8770        | 1389.7202       | 695.3637        | 1388.7361      | 694.8717         | Y    | <b>579.2773</b>  | 290.1423        | 562.2508         | 281.6290        |                  |                  | 5  |
| 12 | 1503.7995        | 752.4034        | 1486.7729       | 743.8901        | 1485.7889      | 743.3981         | P    | <b>416.2140</b>  | 208.6106        | 399.1874         | 200.0974        |                  |                  | 4  |
| 13 | 1618.8264        | 809.9168        | 1601.7999       | 801.4036        | 1600.8158      | 800.9116         | N    | <b>319.1612</b>  | 160.0842        | <b>302.1347</b>  | 151.5710        |                  |                  | 3  |
| 14 | 1675.8479        | 838.4276        | 1658.8213       | 829.9143        | 1657.8373      | 829.4223         | G    | <b>204.1343</b>  | 102.5708        | <b>187.1077</b>  | 94.0575         |                  |                  | 2  |
| 15 |                  |                 |                 |                 |                |                  | K    | <b>147.1128</b>  | 74.0600         | <b>130.0863</b>  | 65.5468         |                  |                  | 1  |

#2-1. Ion Trap GeLC-MS/MS

MS/MS Fragmentation of **M.<sup>168</sup>SVGANDPFLAIFNEFK<sup>184</sup>.K**

Mascot Ion Score: 74

E-value: 4.4e-06

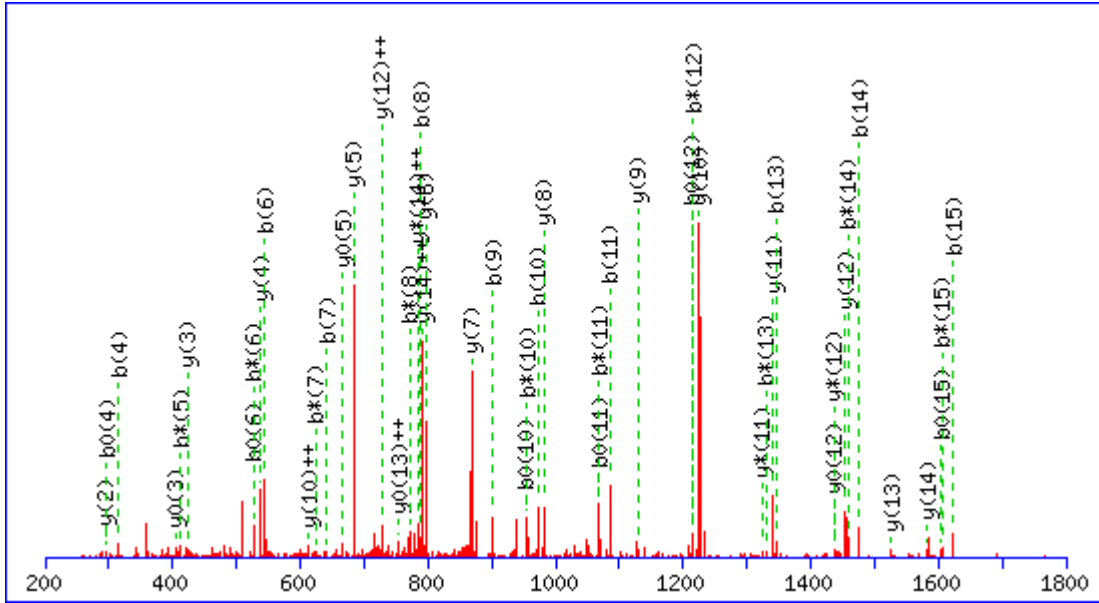

| #  | b         | b <sup>++</sup> | b <sup>*</sup> | b <sup>++</sup> | b <sup>0</sup> | b <sup>0++</sup> | Seq. | y         | y <sup>++</sup> | y <sup>*</sup> | y <sup>++</sup> | y <sup>0</sup> | y <sup>0++</sup> | #  |
|----|-----------|-----------------|----------------|-----------------|----------------|------------------|------|-----------|-----------------|----------------|-----------------|----------------|------------------|----|
| 1  | 88.0393   | 44.5233         |                |                 | 70.0287        | 35.5180          | S    |           |                 |                |                 |                |                  | 16 |
| 2  | 187.1077  | 94.0575         |                |                 | 169.0972       | 85.0522          | V    | 1681.8584 | 841.4329        | 1664.8319      | 832.9196        | 1663.8479      | 832.4276         | 15 |
| 3  | 244.1292  | 122.5682        |                |                 | 226.1186       | 113.5629         | G    | 1582.7900 | 791.8986        | 1565.7635      | 783.3854        | 1564.7795      | 782.8934         | 14 |
| 4  | 315.1663  | 158.0868        |                |                 | 297.1557       | 149.0815         | A    | 1525.7686 | 763.3879        | 1508.7420      | 754.8746        | 1507.7580      | 754.3826         | 13 |
| 5  | 429.2092  | 215.1082        | 412.1827       | 206.5950        | 411.1987       | 206.1030         | N    | 1454.7314 | 727.8694        | 1437.7049      | 719.3561        | 1436.7209      | 718.8641         | 12 |
| 6  | 544.2362  | 272.6217        | 527.2096       | 264.1084        | 526.2256       | 263.6164         | D    | 1340.6885 | 670.8479        | 1323.6620      | 662.3346        | 1322.6780      | 661.8426         | 11 |
| 7  | 641.2889  | 321.1481        | 624.2624       | 312.6348        | 623.2784       | 312.1428         | P    | 1225.6616 | 613.3344        | 1208.6350      | 604.8211        | 1207.6510      | 604.3291         | 10 |
| 8  | 788.3573  | 394.6823        | 771.3308       | 386.1690        | 770.3468       | 385.6770         | F    | 1128.6088 | 564.8080        | 1111.5823      | 556.2948        | 1110.5982      | 555.8028         | 9  |
| 9  | 901.4414  | 451.2243        | 884.4149       | 442.7111        | 883.4308       | 442.2191         | L    | 981.5404  | 491.2738        | 964.5138       | 482.7606        | 963.5298       | 482.2686         | 8  |
| 10 | 972.4785  | 486.7429        | 955.4520       | 478.2296        | 954.4680       | 477.7376         | A    | 868.4563  | 434.7318        | 851.4298       | 426.2185        | 850.4458       | 425.7265         | 7  |
| 11 | 1085.5626 | 543.2849        | 1068.5360      | 534.7717        | 1067.5520      | 534.2796         | I    | 797.4192  | 399.2132        | 780.3927       | 390.7000        | 779.4087       | 390.2080         | 6  |
| 12 | 1232.6310 | 616.8191        | 1215.6045      | 608.3059        | 1214.6204      | 607.8139         | F    | 684.3352  | 342.6712        | 667.3086       | 334.1579        | 666.3246       | 333.6659         | 5  |
| 13 | 1346.6739 | 673.8406        | 1329.6474      | 665.3273        | 1328.6634      | 664.8353         | N    | 537.2667  | 269.1370        | 520.2402       | 260.6237        | 519.2562       | 260.1317         | 4  |
| 14 | 1475.7165 | 738.3619        | 1458.6900      | 729.8486        | 1457.7060      | 729.3566         | E    | 423.2238  | 212.1155        | 406.1973       | 203.6023        | 405.2132       | 203.1103         | 3  |
| 15 | 1622.7849 | 811.8961        | 1605.7584      | 803.3828        | 1604.7744      | 802.8908         | F    | 294.1812  | 147.5942        | 277.1547       | 139.0810        |                |                  | 2  |
| 16 |           |                 |                |                 |                |                  | K    | 147.1128  | 74.0600         | 130.0863       | 65.5468         |                |                  | 1  |

#2-2. TX114 Q-TOF

MS/MS Fragmentation of **M. <sup>168</sup>SVGANDPFLAIFNEFK<sup>184</sup>.K**

Mascot Ion Score: 50

E-value: 0.0025



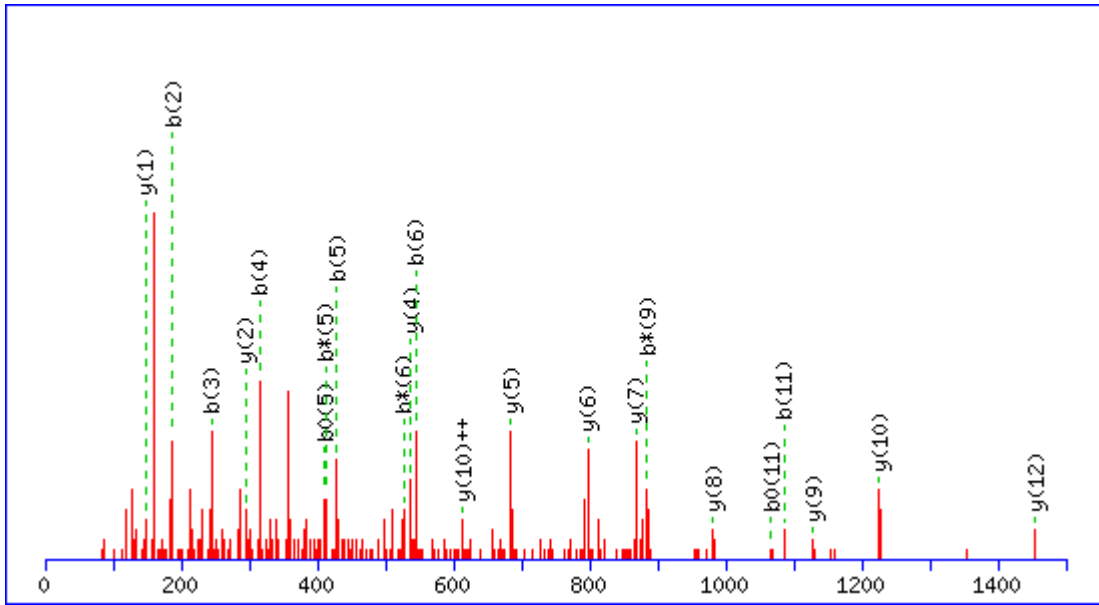

| #  | b                | b <sup>++</sup> | b <sup>*</sup>  | b <sup>*++</sup> | b <sup>0</sup>   | b <sup>0++</sup> | Seq. | y                | y <sup>++</sup> | y <sup>*</sup> | y <sup>*++</sup> | y <sup>0</sup> | y <sup>0++</sup> | #  |
|----|------------------|-----------------|-----------------|------------------|------------------|------------------|------|------------------|-----------------|----------------|------------------|----------------|------------------|----|
| 1  | 88.0393          | 44.5233         |                 |                  | 70.0287          | 35.5180          | S    |                  |                 |                |                  |                |                  | 16 |
| 2  | <b>187.1077</b>  | 94.0575         |                 |                  | 169.0972         | 85.0522          | V    | 1681.8584        | 841.4329        | 1664.8319      | 832.9196         | 1663.8479      | 832.4276         | 15 |
| 3  | <b>244.1292</b>  | 122.5682        |                 |                  | 226.1186         | 113.5629         | G    | 1582.7900        | 791.8986        | 1565.7635      | 783.3854         | 1564.7795      | 782.8934         | 14 |
| 4  | <b>315.1663</b>  | 158.0868        |                 |                  | 297.1557         | 149.0815         | A    | 1525.7686        | 763.3879        | 1508.7420      | 754.8746         | 1507.7580      | 754.3826         | 13 |
| 5  | <b>429.2092</b>  | 215.1082        | <b>412.1827</b> | 206.5950         | <b>411.1987</b>  | 206.1030         | N    | <b>1454.7314</b> | 727.8694        | 1437.7049      | 719.3561         | 1436.7209      | 718.8641         | 12 |
| 6  | <b>544.2362</b>  | 272.6217        | <b>527.2096</b> | 264.1084         | 526.2256         | 263.6164         | D    | 1340.6885        | 670.8479        | 1323.6620      | 662.3346         | 1322.6780      | 661.8426         | 11 |
| 7  | 641.2889         | 321.1481        | 624.2624        | 312.6348         | 623.2784         | 312.1428         | P    | <b>1225.6616</b> | <b>613.3344</b> | 1208.6350      | 604.8211         | 1207.6510      | 604.3291         | 10 |
| 8  | 788.3573         | 394.6823        | 771.3308        | 386.1690         | 770.3468         | 385.6770         | F    | <b>1128.6088</b> | 564.8080        | 1111.5823      | 556.2948         | 1110.5982      | 555.8028         | 9  |
| 9  | 901.4414         | 451.2243        | <b>884.4149</b> | 442.7111         | 883.4308         | 442.2191         | L    | <b>981.5404</b>  | 491.2738        | 964.5138       | 482.7606         | 963.5298       | 482.2686         | 8  |
| 10 | 972.4785         | 486.7429        | 955.4520        | 478.2296         | 954.4680         | 477.7376         | A    | <b>868.4563</b>  | 434.7318        | 851.4298       | 426.2185         | 850.4458       | 425.7265         | 7  |
| 11 | <b>1085.5626</b> | 543.2849        | 1068.5360       | 534.7717         | <b>1067.5520</b> | 534.2796         | I    | <b>797.4192</b>  | 399.2132        | 780.3927       | 390.7000         | 779.4087       | 390.2080         | 6  |
| 12 | 1232.6310        | 616.8191        | 1215.6045       | 608.3059         | 1214.6204        | 607.8139         | F    | <b>684.3352</b>  | 342.6712        | 667.3086       | 334.1579         | 666.3246       | 333.6659         | 5  |
| 13 | 1346.6739        | 673.8406        | 1329.6474       | 665.3273         | 1328.6634        | 664.8353         | N    | <b>537.2667</b>  | 269.1370        | 520.2402       | 260.6237         | 519.2562       | 260.1317         | 4  |
| 14 | 1475.7165        | 738.3619        | 1458.6900       | 729.8486         | 1457.7060        | 729.3566         | E    | 423.2238         | 212.1155        | 406.1973       | 203.6023         | 405.2132       | 203.1103         | 3  |
| 15 | 1622.7849        | 811.8961        | 1605.7584       | 803.3828         | 1604.7744        | 802.8908         | F    | <b>294.1812</b>  | 147.5942        | 277.1547       | 139.0810         |                |                  | 2  |
| 16 |                  |                 |                 |                  |                  |                  | K    | <b>147.1128</b>  | 74.0600         | 130.0863       | 65.5468          |                |                  | 1  |

#2-3. 2D gel spot

MS/MS Fragmentation of **M.<sup>168</sup>SVGANDPFLAIFNEFK<sup>184</sup>.K**

Mascot Ion Score: 82

E-value: 0.011

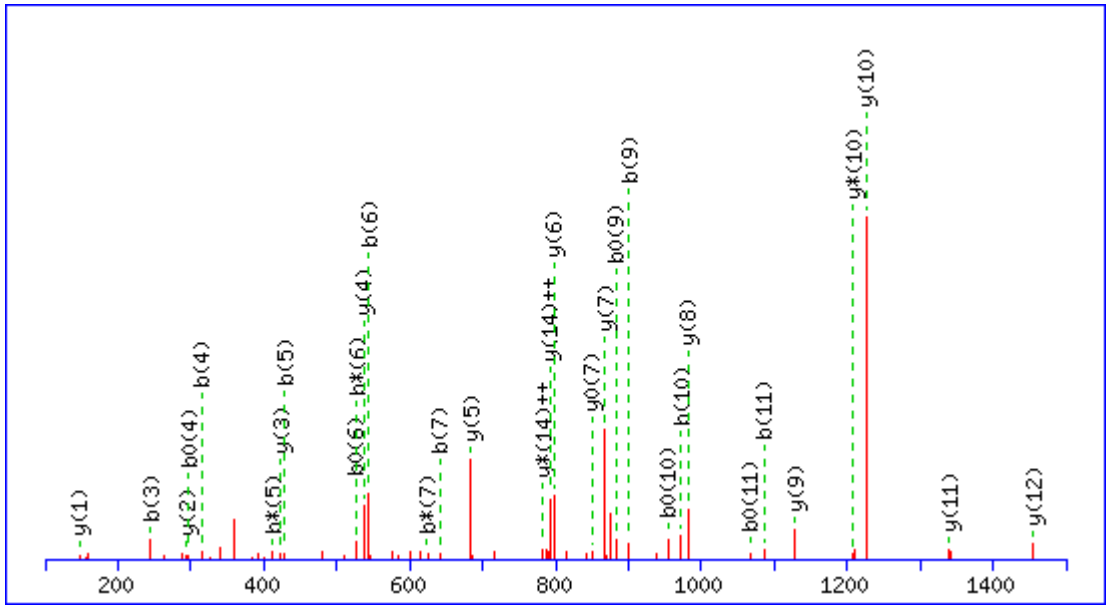

| #  | b                | b <sup>++</sup> | b <sup>*</sup>  | b <sup>*++</sup> | b <sup>0</sup>   | b <sup>0++</sup> | Seq. | y                | y <sup>++</sup> | y <sup>*</sup>   | y <sup>*++</sup> | y <sup>0</sup>  | y <sup>0++</sup> | #  |
|----|------------------|-----------------|-----------------|------------------|------------------|------------------|------|------------------|-----------------|------------------|------------------|-----------------|------------------|----|
| 1  | 88.0393          | 44.5233         |                 |                  | 70.0287          | 35.5180          | S    |                  |                 |                  |                  |                 |                  | 16 |
| 2  | 187.1077         | 94.0575         |                 |                  | 169.0972         | 85.0522          | V    | 1681.8584        | 841.4329        | 1664.8319        | 832.9196         | 1663.8479       | 832.4276         | 15 |
| 3  | <b>244.1292</b>  | 122.5682        |                 |                  | 226.1186         | 113.5629         | G    | 1582.7900        | <b>791.8986</b> | 1565.7635        | <b>783.3854</b>  | 1564.7795       | 782.8934         | 14 |
| 4  | <b>315.1663</b>  | 158.0868        |                 |                  | <b>297.1557</b>  | 149.0815         | A    | 1525.7686        | 763.3879        | 1508.7420        | 754.8746         | 1507.7580       | 754.3826         | 13 |
| 5  | <b>429.2092</b>  | 215.1082        | <b>412.1827</b> | 206.5950         | 411.1987         | 206.1030         | N    | <b>1454.7314</b> | 727.8694        | 1437.7049        | 719.3561         | 1436.7209       | 718.8641         | 12 |
| 6  | <b>544.2362</b>  | 272.6217        | <b>527.2096</b> | 264.1084         | <b>526.2256</b>  | 263.6164         | D    | <b>1340.6885</b> | 670.8479        | 1323.6620        | 662.3346         | 1322.6780       | 661.8426         | 11 |
| 7  | <b>641.2889</b>  | 321.1481        | <b>624.2624</b> | 312.6348         | 623.2784         | 312.1428         | P    | <b>1225.6616</b> | 613.3344        | <b>1208.6350</b> | 604.8211         | 1207.6510       | 604.3291         | 10 |
| 8  | 788.3573         | 394.6823        | 771.3308        | 386.1690         | 770.3468         | 385.6770         | F    | <b>1128.6088</b> | 564.8080        | 1111.5823        | 556.2948         | 1110.5982       | 555.8028         | 9  |
| 9  | <b>901.4414</b>  | 451.2243        | 884.4149        | 442.7111         | <b>883.4308</b>  | 442.2191         | L    | <b>981.5404</b>  | 491.2738        | 964.5138         | 482.7606         | 963.5298        | 482.2686         | 8  |
| 10 | <b>972.4785</b>  | 486.7429        | 955.4520        | 478.2296         | <b>954.4680</b>  | 477.7376         | A    | <b>868.4563</b>  | 434.7318        | 851.4298         | 426.2185         | <b>850.4458</b> | 425.7265         | 7  |
| 11 | <b>1085.5626</b> | 543.2849        | 1068.5360       | 534.7717         | <b>1067.5520</b> | 534.2796         | I    | <b>797.4192</b>  | 399.2132        | 780.3927         | 390.7000         | 779.4087        | 390.2080         | 6  |
| 12 | 1232.6310        | 616.8191        | 1215.6045       | 608.3059         | 1214.6204        | 607.8139         | F    | <b>684.3352</b>  | 342.6712        | 667.3086         | 334.1579         | 666.3246        | 333.6659         | 5  |
| 13 | 1346.6739        | 673.8406        | 1329.6474       | 665.3273         | 1328.6634        | 664.8353         | N    | <b>537.2667</b>  | 269.1370        | 520.2402         | 260.6237         | 519.2562        | 260.1317         | 4  |
| 14 | 1475.7165        | 738.3619        | 1458.6900       | 729.8486         | 1457.7060        | 729.3566         | E    | <b>423.2238</b>  | 212.1155        | 406.1973         | 203.6023         | 405.2132        | 203.1103         | 3  |
| 15 | 1622.7849        | 811.8961        | 1605.7584       | 803.3828         | 1604.7744        | 802.8908         | F    | <b>294.1812</b>  | 147.5942        | 277.1547         | 139.0810         |                 |                  | 2  |
| 16 |                  |                 |                 |                  |                  |                  | K    | <b>147.1128</b>  | 74.0600         | 130.0863         | 65.5468          |                 |                  | 1  |

#### #4-1. Q-TOF GeLC-MS/MS

MS/MS Fragmentation of **F**.<sup>504</sup>**FAELNTDQEI**K<sup>514</sup>**E**

Mascot Ion Score: 56

E-value: 0.0024

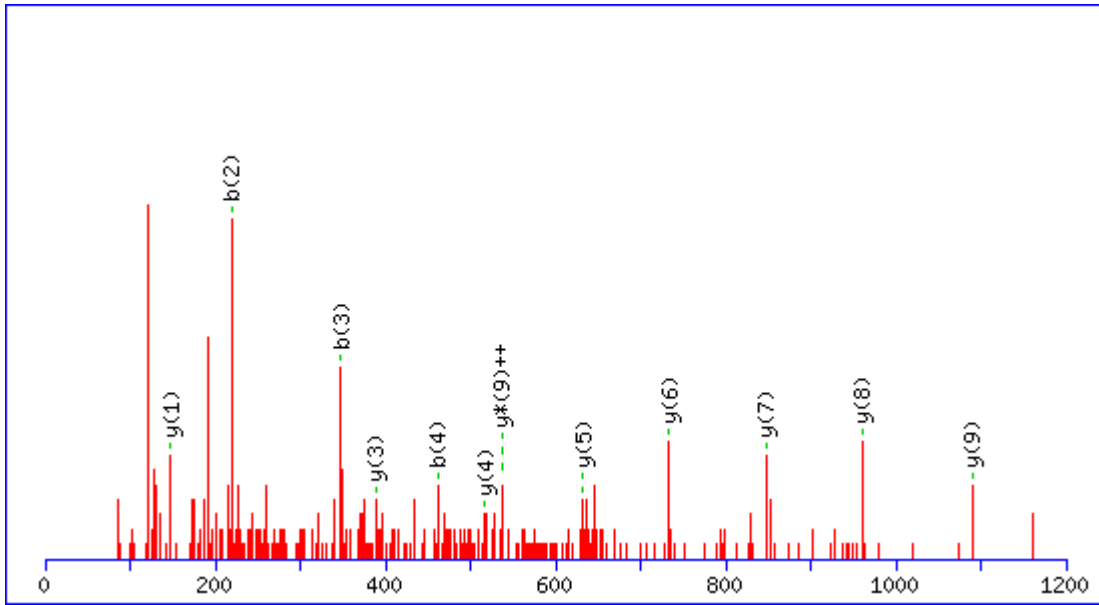

| #  | b         | b <sup>++</sup> | b <sup>*</sup> | b <sup>***</sup> | b <sup>0</sup> | b <sup>0++</sup> | Seq. | y         | y <sup>++</sup> | y <sup>*</sup> | y <sup>***</sup> | y <sup>0</sup> | y <sup>0++</sup> | #  |
|----|-----------|-----------------|----------------|------------------|----------------|------------------|------|-----------|-----------------|----------------|------------------|----------------|------------------|----|
| 1  | 148.0757  | 74.5415         |                |                  |                |                  | F    |           |                 |                |                  |                |                  | 11 |
| 2  | 219.1128  | 110.0600        |                |                  |                |                  | A    | 1160.5794 | 580.7933        | 1143.5528      | 572.2800         | 1142.5688      | 571.7880         | 10 |
| 3  | 348.1554  | 174.5813        |                |                  | 330.1448       | 165.5761         | E    | 1089.5422 | 545.2748        | 1072.5157      | 536.7615         | 1071.5317      | 536.2695         | 9  |
| 4  | 461.2395  | 231.1234        |                |                  | 443.2289       | 222.1181         | L    | 960.4997  | 480.7535        | 943.4731       | 472.2402         | 942.4891       | 471.7482         | 8  |
| 5  | 575.2824  | 288.1448        | 558.2558       | 279.6316         | 557.2718       | 279.1395         | N    | 847.4156  | 424.2114        | 830.3890       | 415.6982         | 829.4050       | 415.2061         | 7  |
| 6  | 676.3301  | 338.6687        | 659.3035       | 330.1554         | 658.3195       | 329.6634         | T    | 733.3727  | 367.1900        | 716.3461       | 358.6767         | 715.3621       | 358.1847         | 6  |
| 7  | 791.3570  | 396.1821        | 774.3305       | 387.6689         | 773.3464       | 387.1769         | D    | 632.3250  | 316.6661        | 615.2984       | 308.1529         | 614.3144       | 307.6608         | 5  |
| 8  | 919.4156  | 460.2114        | 902.3890       | 451.6982         | 901.4050       | 451.2061         | Q    | 517.2980  | 259.1527        | 500.2715       | 250.6394         | 499.2875       | 250.1474         | 4  |
| 9  | 1048.4582 | 524.7327        | 1031.4316      | 516.2195         | 1030.4476      | 515.7274         | E    | 389.2395  | 195.1234        | 372.2129       | 186.6101         | 371.2289       | 186.1181         | 3  |
| 10 | 1161.5422 | 581.2748        | 1144.5157      | 572.7615         | 1143.5317      | 572.2695         | I    | 260.1969  | 130.6021        | 243.1703       | 122.0888         |                |                  | 2  |
| 11 |           |                 |                |                  |                |                  | K    | 147.1128  | 74.0600         | 130.0863       | 65.5468          |                |                  | 1  |

#### #4-2. 2D gel spot

MS/MS Fragmentation of **F.<sup>504</sup>FAELNTDQEI<sup>514</sup>.E**

Mascot Ion Score: 90

E-value: 0.0014

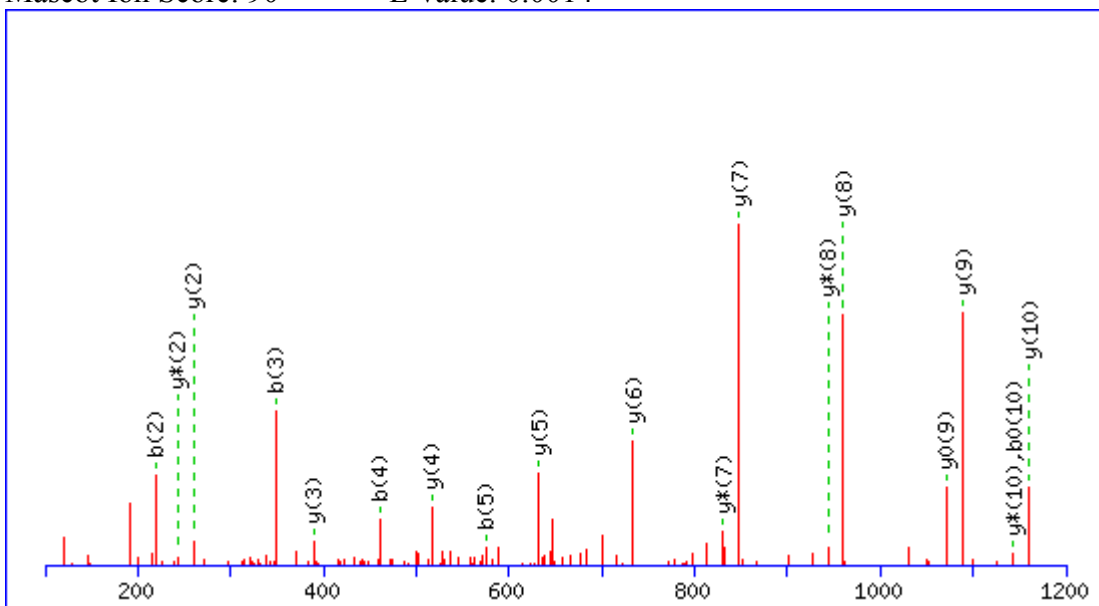

| #  | b               | b <sup>++</sup> | b*        | b <sup>***</sup> | b <sup>0</sup>   | b <sup>0++</sup> | Seq. | y                | y <sup>++</sup> | y*               | y <sup>***</sup> | y <sup>0</sup>   | y <sup>0++</sup> | #  |
|----|-----------------|-----------------|-----------|------------------|------------------|------------------|------|------------------|-----------------|------------------|------------------|------------------|------------------|----|
| 1  | 148.0757        | 74.5415         |           |                  |                  |                  | F    |                  |                 |                  |                  |                  |                  | 11 |
| 2  | <b>219.1128</b> | 110.0600        |           |                  |                  |                  | A    | <b>1160.5794</b> | 580.7933        | <b>1143.5528</b> | 572.2800         | 1142.5688        | 571.7880         | 10 |
| 3  | <b>348.1554</b> | 174.5813        |           |                  | 330.1448         | 165.5761         | E    | <b>1089.5422</b> | 545.2748        | 1072.5157        | 536.7615         | <b>1071.5317</b> | 536.2695         | 9  |
| 4  | <b>461.2395</b> | 231.1234        |           |                  | 443.2289         | 222.1181         | L    | <b>960.4997</b>  | 480.7535        | <b>943.4731</b>  | 472.2402         | 942.4891         | 471.7482         | 8  |
| 5  | <b>575.2824</b> | 288.1448        | 558.2558  | 279.6316         | 557.2718         | 279.1395         | N    | <b>847.4156</b>  | 424.2114        | <b>830.3890</b>  | 415.6982         | 829.4050         | 415.2061         | 7  |
| 6  | 676.3301        | 338.6687        | 659.3035  | 330.1554         | 658.3195         | 329.6634         | T    | <b>733.3727</b>  | 367.1900        | 716.3461         | 358.6767         | 715.3621         | 358.1847         | 6  |
| 7  | 791.3570        | 396.1821        | 774.3305  | 387.6689         | 773.3464         | 387.1769         | D    | <b>632.3250</b>  | 316.6661        | 615.2984         | 308.1529         | 614.3144         | 307.6608         | 5  |
| 8  | 919.4156        | 460.2114        | 902.3890  | 451.6982         | 901.4050         | 451.2061         | Q    | <b>517.2980</b>  | 259.1527        | 500.2715         | 250.6394         | 499.2875         | 250.1474         | 4  |
| 9  | 1048.4582       | 524.7327        | 1031.4316 | 516.2195         | 1030.4476        | 515.7274         | E    | <b>389.2395</b>  | 195.1234        | 372.2129         | 186.6101         | 371.2289         | 186.1181         | 3  |
| 10 | 1161.5422       | 581.2748        | 1144.5157 | 572.7615         | <b>1143.5317</b> | 572.2695         | I    | <b>260.1969</b>  | 130.6021        | <b>243.1703</b>  | 122.0888         |                  |                  | 2  |
| 11 |                 |                 |           |                  |                  |                  | K    | 147.1128         | 74.0600         | 130.0863         | 65.5468          |                  |                  | 1  |

#### #4-3. 2D gel spot

MS/MS Fragmentation of **F.<sup>504</sup>FAELNTDQEI<sup>514</sup>.E + Deamidated (NQ)**

Mascot Ion Score: 108

E-value: 2.8e-05

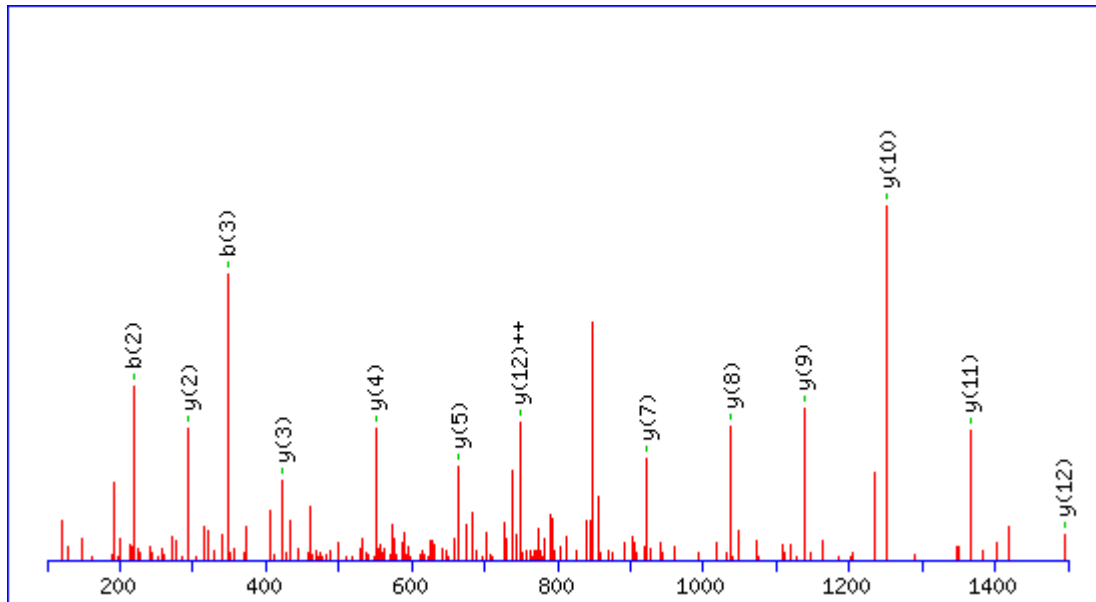

| #  | b               | b <sup>++</sup> | b*        | b <sup>***</sup> | b <sup>0</sup> | b <sup>0++</sup> | Seq. | y                | y <sup>++</sup> | y*        | y <sup>***</sup> | y <sup>0</sup> | y <sup>0++</sup> | #  |
|----|-----------------|-----------------|-----------|------------------|----------------|------------------|------|------------------|-----------------|-----------|------------------|----------------|------------------|----|
| 1  | 148.0757        | 74.5415         |           |                  |                |                  | F    |                  |                 |           |                  |                |                  | 14 |
| 2  | <b>219.1128</b> | 110.0600        |           |                  |                |                  | A    | 1565.7693        | 783.3883        | 1548.7428 | 774.8750         | 1547.7588      | 774.3830         | 13 |
| 3  | <b>348.1554</b> | 174.5813        |           |                  | 330.1448       | 165.5761         | E    | <b>1494.7322</b> | <b>747.8698</b> | 1477.7057 | 739.3565         | 1476.7217      | 738.8645         | 12 |
| 4  | 461.2395        | 231.1234        |           |                  | 443.2289       | 222.1181         | L    | <b>1365.6896</b> | 683.3485        | 1348.6631 | 674.8352         | 1347.6791      | 674.3432         | 11 |
| 5  | <b>575.2824</b> | 288.1448        | 558.2558  | 279.6316         | 557.2718       | 279.1395         | N    | <b>1252.6056</b> | 626.8064        | 1235.5790 | 618.2932         | 1234.5950      | 617.8011         | 10 |
| 6  | 676.3301        | 338.6687        | 659.3035  | 330.1554         | 658.3195       | 329.6634         | T    | <b>1138.5626</b> | 569.7850        | 1121.5361 | 561.2717         | 1120.5521      | 560.7797         | 9  |
| 7  | 791.3570        | 396.1821        | 774.3305  | 387.6689         | 773.3464       | 387.1769         | D    | <b>1037.5150</b> | 519.2611        | 1020.4884 | 510.7478         | 1019.5044      | 510.2558         | 8  |
| 8  | 920.3996        | 460.7034        | 903.3731  | 452.1902         | 902.3890       | 451.6982         | Q    | <b>922.4880</b>  | 461.7477        | 905.4615  | 453.2344         | 904.4775       | 452.7424         | 7  |
| 9  | 1049.4422       | 525.2247        | 1032.4156 | 516.7115         | 1031.4316      | 516.2195         | E    | 793.4454         | 397.2264        | 776.4189  | 388.7131         | 775.4349       | 388.2211         | 6  |
| 10 | 1162.5263       | 581.7668        | 1145.4997 | 573.2535         | 1144.5157      | 572.7615         | I    | <b>664.4028</b>  | 332.7051        | 647.3763  | 324.1918         | 646.3923       | 323.6998         | 5  |
| 11 | 1290.6212       | 645.8143        | 1273.5947 | 637.3010         | 1272.6107      | 636.8090         | K    | <b>551.3188</b>  | 276.1630        | 534.2922  | 267.6498         | 533.3082       | 267.1577         | 4  |
| 12 | 1419.6638       | 710.3355        | 1402.6373 | 701.8223         | 1401.6533      | 701.3303         | E    | <b>423.2238</b>  | 212.1155        | 406.1973  | 203.6023         | 405.2132       | 203.1103         | 3  |
| 13 | 1566.7322       | 783.8698        | 1549.7057 | 775.3565         | 1548.7217      | 774.8645         | F    | <b>294.1812</b>  | 147.5942        | 277.1547  | 139.0810         |                |                  | 2  |
| 14 |                 |                 |           |                  |                |                  | K    | 147.1128         | 74.0600         | 130.0863  | 65.5468          |                |                  | 1  |

## **Description of peptide-centric methods**

### *Protein extraction and digestion for peptide fractionation by isoelectric focusing*

Harvested cell pellets were freeze-dried and lyophilised cells were resuspended in 8 M urea, 100 mM NH<sub>4</sub>HCO<sub>3</sub>, pH 9 and sonicated with an ultrasonic probe at 80% power for 3 × 30 s on ice. Reduction and alkylation of cysteine and precipitation was carried out as described above. The protein was resuspended in 8 M urea, 100 mM NH<sub>4</sub>HCO<sub>3</sub>, pH 9 and digested to peptides firstly by addition of 2.5 µg of Endoproteinase LysC [Roche, Switzerland] and incubating overnight at 37°C. The sample was then diluted to 1 M urea by adding 100 mM NH<sub>4</sub>HCO<sub>3</sub> prior to the addition of 2.5 µg of trypsin [Promega, USA] and incubated at 37°C for 16 h. Formic acid was added to a concentration of 1% and the peptides desalted and concentrated using an OASIS HLB SPE column [Waters, 1cc] as per manufacturer's instructions. Bound peptides were eluted with 75% acetonitrile, 0.2% formic acid. The acetonitrile was removed by lyophilisation to a volume of 50 µl and 5 µl removed for 1DLC-MS/MS using Q-TOF.

Isoelectric fractionation of peptides was performed using an Agilent 3100 OFFGEL system as per the manufacturer's instructions with the following modifications. A 13 cm pH 3-10 IPG strip [GE Healthcare] was rehydrated with a solution of 7 M urea, 2 M thiourea, 1% C7BzO and 12% glycerol for 30 min before assembling with the OFFGEL frames (12 well). 100 µg of protein digest (prepared as for SCX) was desalted and concentrated using an OASIS HLB SPE column, lyophilised to remove acetonitrile and the resulting peptide mixture was diluted to 1.8 mL with 7 M urea, 2 M thiourea, 1% C7BzO and 12% glycerol and equal volumes loaded into the 12 wells of the assembled OFFGEL frame. Isoelectric focusing was performed overnight using the following program: 150-3000 V over 3 h, 3000-10000 V over 5 h, 10000 V until 100 kVh was reached. Fractions were then recovered into separate tubes and frozen at -20°C until further analysed by 1DLC-MS/MS using Q-TOF.
